# Supplementary material
Source: publisher site journal article supplement (https://en-cdn.bio-protocol.org/attached/file/20171207/Supplementary%20file%20Figure%20S1.docx)
Supplement: Supplementary file 1 [file Supplementary%20file%20Figure%20S1.docx]

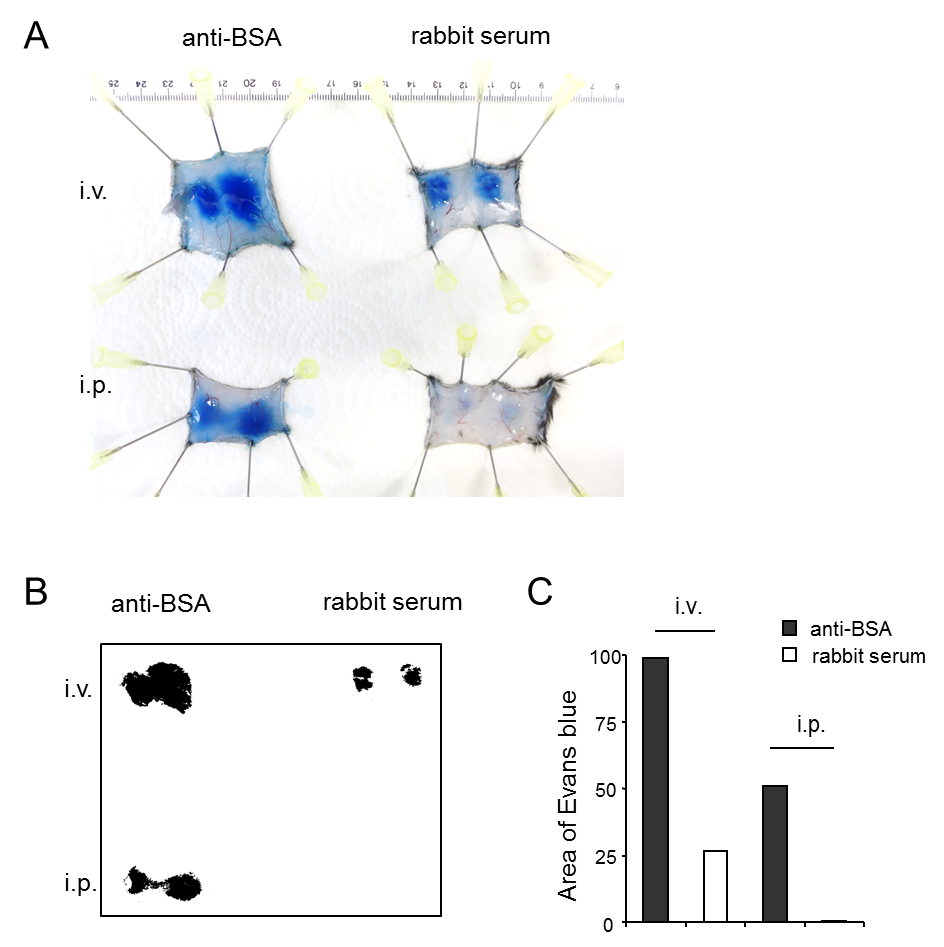


**Figure S1. Intraperitoneal injection of Evans blue-BSA solution.** A.100 µl Evans blue-BSA solution was injected intravenously (upper panel) or intraperitoneally (lower panel). The Arthus reaction was elicited by intradermal injection of 40 µl of anti-BSA antibody or rabbit serum as background control. 4 h later, mice were sacrificed and the skin specimen was harvested and digitally photographed. B and C. The areas of Evans blue spots in skin were analyzed by ImageJ.
